# Supplementary material for: Development of Type 1 Diabetes in Mice Is Associated with a Decrease in IL-2-Producing ILC3 and FoxP3+ Treg in the Small Intestine
Source: MDPI journal article supplement (doi:10.3390/molecules28083366), 2023-04-11
Supplement: s1 [file s1]

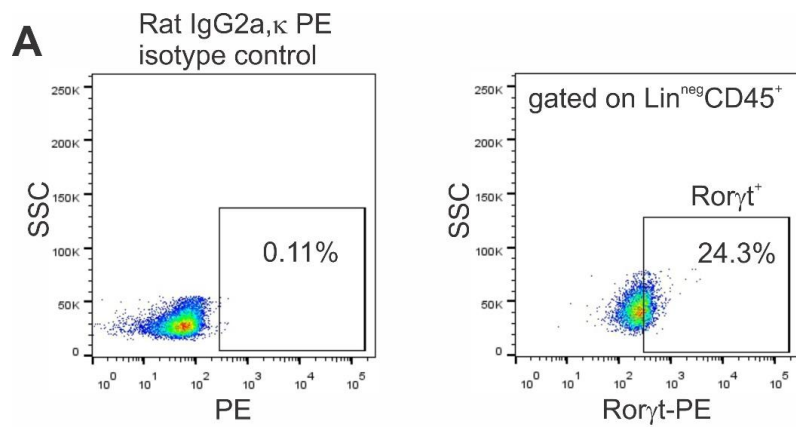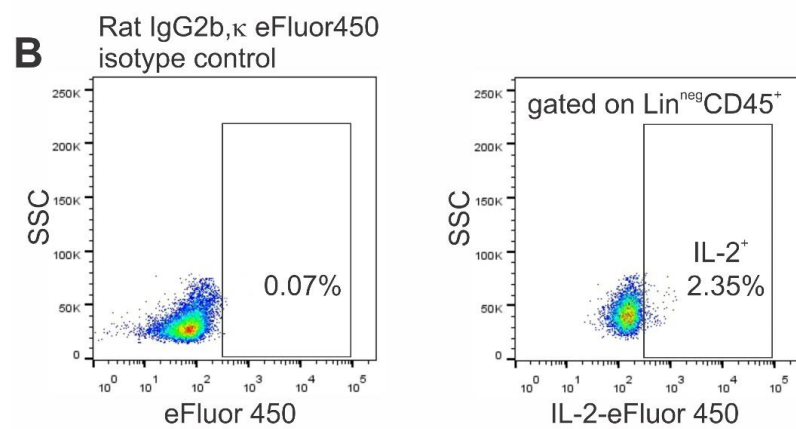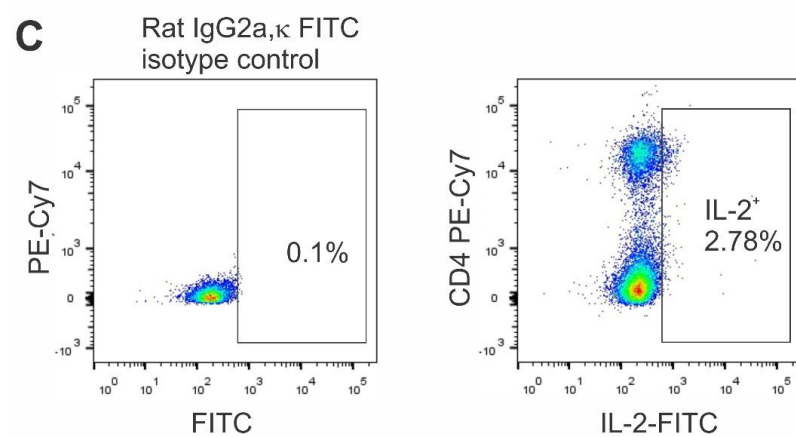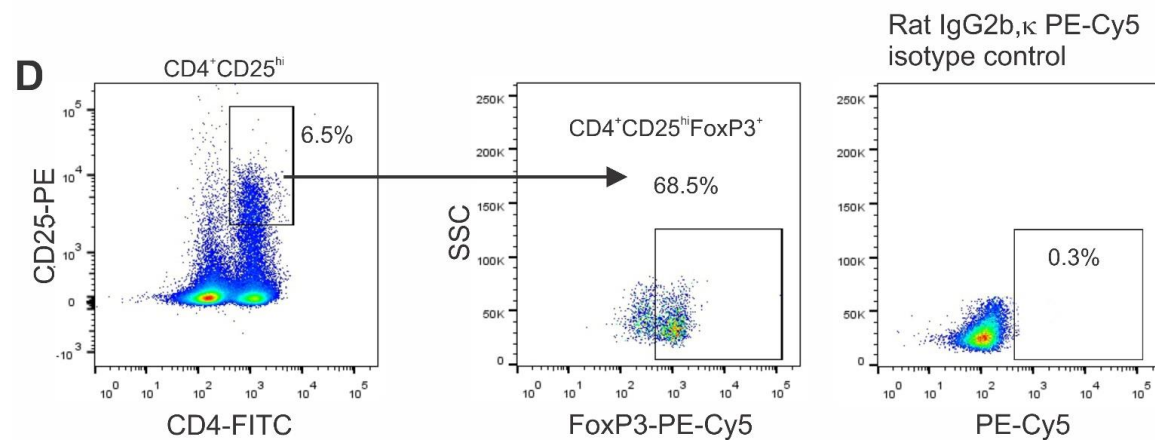

**Figure S1. Isotype controls and gating strategy.** A) Ror $\gamma$ t PE staining and the adequate isotype control, SILP cells. B) IL-2 eFluor450 staining and the adequate isotype control, SILP cells (for the experiment where comparison was made between healthy and MLDS hyperglycemic C57BL/6 mice. C) IL-2 FITC within CD4<sup>+</sup> and the adequate isotype control, spleen cells (for the experiment where comparison was made between young and old NOD and MLDS and ABX+MLDS mice. D) Gating strategy for Treg (spleen cells) and the adequate isotype control for FoxP3.
